# Supplementary material
Source: publisher figshare collection journal article supplement (https://sage.figshare.com/ndownloader/files/14530367)
Supplement: Supplementary file 1 [file 14530367]

**Supplementary Table 1:***Estimated proportion of adolescents following each trajectory of conduct and emotional problems*

| <b>Trajectory groups</b>  | <b>Estimated<sup>a</sup></b> | <b>Classified<sup>b</sup></b> | <b>Group membership<sup>c</sup></b> |
|---------------------------|------------------------------|-------------------------------|-------------------------------------|
|                           | <b>%</b>                     | <b>%</b>                      | <b>N</b>                            |
| <b>Emotional problems</b> |                              |                               |                                     |
| High-persistent           | 31.5                         | 33.0                          | 43                                  |
| Moderate-increasing       | 27.5                         | 28.5                          | 37                                  |
| Moderate-resolving        | 15.0                         | 10.0                          | 13                                  |
| Persistent-low            | 25.9                         | 28.5                          | 37                                  |
| <b>Conduct problems</b>   |                              |                               |                                     |
| High-persistent           | 18.5                         | 19.0                          | 25                                  |
| High-declining            | 8.0                          | 7.0                           | 9                                   |
| Moderate                  | 46.0                         | 47.0                          | 61                                  |
| Persistent-low            | 27.5                         | 27.0                          | 35                                  |

<sup>a</sup> Estimated proportion of adolescents following each trajectory based on posterior probability for membership of each group <sup>b</sup> Percentage of participants classified to each group <sup>c</sup> Group membership numbers.
